# Supplementary material for: An instrument for the rapid quantification of PM oxidative potential: the Particle Into Nitroxide Quencher (PINQ)
Source: Copernicus journal article supplement (doi:10.5194/amt-2018-333), 2018-11-05
Supplement: Supplementary file 1 [file amt-2018-333-supplement.pdf]

## Supplementary Material

### S1. Filter Collection Efficiency

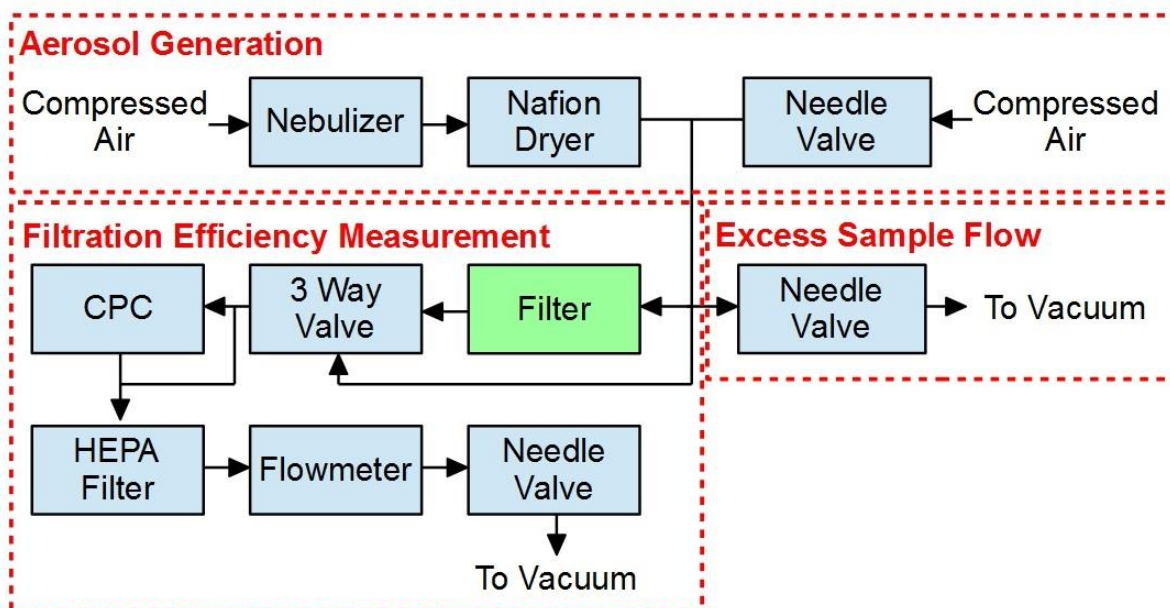

Figure S1 Flow diagram of setup used to measure the collection efficiency of the filters used in the IAC mass characterization. Aerosol generation stage is identical to the setup used in the characterization experiments. Aerosol is generated through a nebulizer and dried with a nafion dryer. Makeup air at a flowrate dilutes the aerosol sample to provide similar particle number concentrations to the mass collection efficiency studies. Excess sample flow is removed using vacuum line regulated by a needle valve. CPC was used to measure particle concentrations before and after the filter by way of a 3-way valve. CPC exhaust was connected to a CPC bypass flow which is filtered, measured with a flowmeter and regulated by a needle valve to vacuum to maintain the same filter sample flowrate used in mass collection efficiency studies.

The filter collection efficiency was measured through the measurement of ammonium sulphate particle number concentrations before and the filter (Whatman Nuclepore polycarbonate membrane, 25 mm diameter, 0.2  $\mu\text{m}$  pore size). The setup was made using the same aerosol generation stage as described in Sect. 3.1.1. to ensure comparable aerosol properties. A 5  $\text{g.L}^{-1}$  solution of ammonium sulphate in water was dispersed using a multi-jet nebulizer (Mesa Labs 6 Jet Collision Nebulizer). The generated aerosol was dried using a nafion dryer and mixed with a dry, HEPA-filtered makeup air with the same flowrate as used in Sect. 3.1.1. to ensure the same dilution was achieved. Excess sample aerosol was removed using a vacuum line regulated through a needle valve. A 3 way valve was used to alternate between flowing through the filter, and bypassing it. The resulting aerosol particle number concentration was measured using a TSI 3025 CPC. The exhaust of the CPC was connected to a bypass line to a needle valve running to vacuum in order to regulate the total flow through the filter to 5  $\text{L.min}^{-1}$ . The flowrate was measured for each sample using a TSI 4043 mass flow meter to account for any dilution changes. 10 samples before and after the filter were taken. The collection efficiency of the filters ( $CE_f$ ) was calculated as:

$$CE_f = 1.000 \pm 0.009$$

## S2. Mass Collection Efficiency

### S2.1 Mass Collection Efficiency Methodology

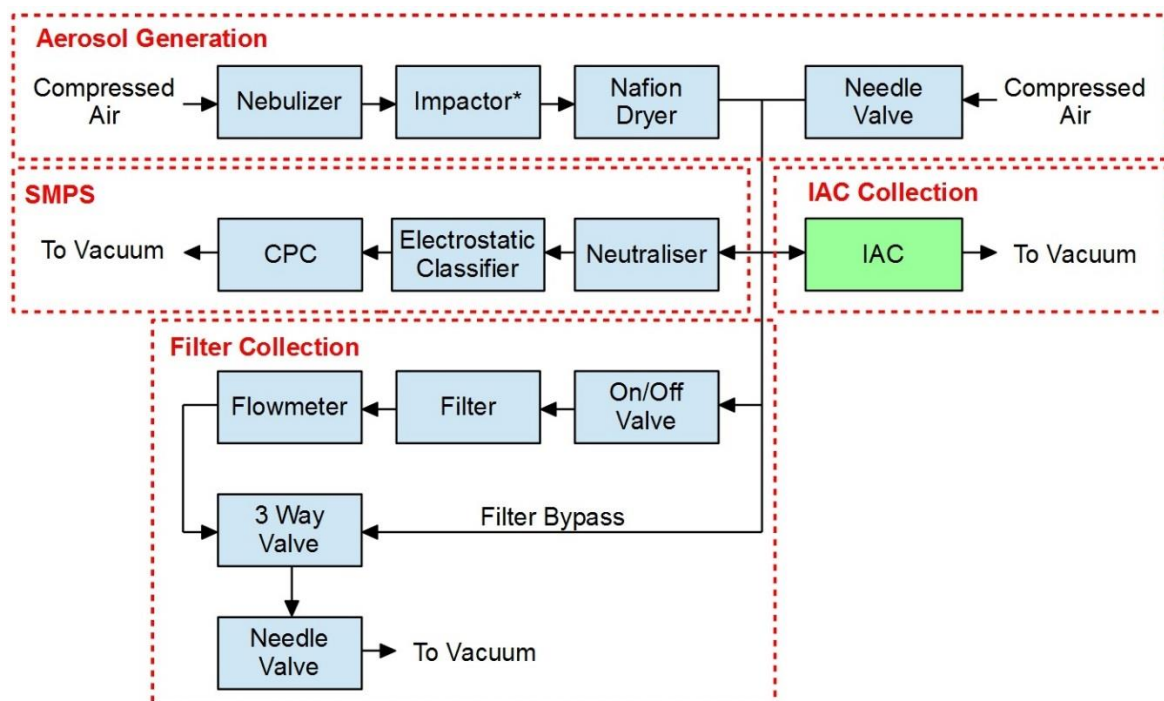

Figure S2 Flow diagram of experimental setup for particle mass collection efficiency investigation. Aerosol is generated through a nebulizer and dried with a nafion dryer.\*Impactor is installed to remove large particles for ultrafine particle ( $PM_{0.1}$ ) collection experiments. Makeup air dilutes the aerosol sample to provide sufficient sample flowrate for the setup. The corresponding aerosol sample is split between the SMPS, IAC and filter. Filter collection contains a bypass flow enabling filters to be installed and replaced without disrupting flow conditions in the setup.

Figure S2 provides a detailed description of the experimental setup used to investigate the mass collection efficiency of the IAC for both fine ( $PM_{2.5}$ ) and ultrafine ( $PM_{0.1}$ ) particles discussed in Sect. 3.1.1. A  $5 \text{ g.L}^{-1}$  solution of ammonium sulphate in water was dispersed using a multi-jet nebulizer (Mesa Labs 6 Jet Collision Nebulizer). The generated aerosol was dried using a nafion dryer and mixed with a dry, HEPA-filtered makeup air to provide the required combined sample flowrate. The sample aerosol was then split three ways to the PINQ, filter (Whatman Nuclepore polycarbonate membrane, 25 mm diameter,  $0.2 \mu\text{m}$  pore size), and SMPS (TSI 3071 Classifier, TSI 3772 Condensation Particle Counter, Aerosol Instrument Manager (AIM) software).

The filter sample rate was nominally set to  $5 \text{ L.min}^{-1}$  using a needle valve and monitored throughout the sample with a TSI 4043 mass flow meter. The IAC aerosol flowrate was set to  $16.7 \text{ L.min}^{-1}$ , and a  $1.5 \text{ mL.min}^{-1}$  water flow was input into the steam generator using a peristaltic pump.

The IAC relies on condensational growth to successfully capture ultrafine particles into liquid. A consequence of this is that a certain amount of water will dilute the liquid sample exiting the base of the vortex collector, due to both: the collection of grown water droplets containing ultrafine particles for analysis; and the condensation of water inside the cyclone due to the excess supersaturation required to grow hydrophobic ultrafine particles. In order to correct for this effect a  $0.5 \text{ g.L}^{-1}$  solution of sodium chloride in deionized water was prepared for use as the liquid sample flow in the IAC. The chloride ion concentrations of each sample were measured before and after

each sample, and a correction referred to as the steam dilution factor (SDF) was calculated using *Equation S1*.

*Equation S1*

$$SDF = \frac{C_{Cl^-}(sample)}{C_{Cl^-}(supply)}$$

Where:  $C_{Cl^-}(sample)$  is the chloride ion concentration in ppm of the collected sample which has been diluted by condensed steam from the aerosol; and  $C_{Cl^-}(supply)$  is the chloride ion concentration in ppm of the initial sample liquid.

Fine (PM<sub>2.5</sub>) samples were collected without the impactor in the setup detailed in Figure S2. A 1 mL.min<sup>-1</sup> flowrate regulated by a peristaltic pump was set for both the collection liquid entering into the vortex collector and the sample liquid exiting. Eight filter samples with corresponding simultaneous IAC samples were taken over 15 minutes. SMPS size distribution scans with a three minute scan time were taken continuously throughout the experiment.

Ultrafine (PM<sub>0.1</sub>) samples were collected with an impactor (TSI, 0.0508 cm nozzle size) in front of the nebulizer as in the setup detailed in Figure S2. This impactor generated a size cut-off at ~100 nm corresponding to ultrafine size range boundary. Due to the significantly reduced mass of these samples generated by the removal of particles >100 nm, the sampling methodology was altered to ensure a detectable result. The collection liquid and sample liquid flows entering and exiting the vortex collector were reduced to 0.15 mL.min<sup>-1</sup>. This significantly increased the concentration of aerosol in the IAC sample liquid at the expense of a higher steam dilution effect. Furthermore, the collection time for samples was extended to 60 min to increase the aerosol mass deposited on the filters.

## S2.2. Mass Collection Efficiency Calculations

The sulphate mass collected for each IAC sample ( $M_{IAC}$ ) in mg was calculated through *Equation S2*.

*Equation S2*

$$M_{IAC} = \frac{CI_{SO_4^{2-}}}{SDF} * T * q_{ls} * \rho_{water}$$

Where:  $CI_{SO_4^{2-}}$  is the sulphate concentration of the IAC sample in ppm; SDF is the steam dilution factor of the sample; T is the sample period in minutes;  $q_{ls}$  is the liquid sample flowrate in L.min<sup>-1</sup>; and  $\rho_{water}$  is the density of water in g.L<sup>-1</sup>.

The sulphate mass collected for each filter sample ( $M_f$ ) in mg was calculated through *Equation S3*.

*Equation S3*

$$M_f = CF_{SO_4^{2-}} * V_l * \rho_{water}$$

Where:  $CF_{SO_4^{2-}}$  is the sulphate concentration of the filter sample in ppm;  $V_l$  is the volume of liquid used in the filter extraction in L.

The collection efficiency (CE) of each sample was calculated using *Equation S4*.

*Equation S4*

$$CE = \frac{M_{IAC}}{\frac{M_f}{V_f * CE_f} * V_{IAC}}$$

Where:  $V_f$  is the air volume sampled by the filter in L;  $CE_f$  is the collection efficiency of the filter; and  $V_{IAC}$  is the air volume sampled by the IAC.

### S2.3. Mass Collection Efficiency Data

The presented here was used to calculate the final values shown in Sect. 4.1.1. of the manuscript.

The averaged SMPS particle size distribution of the ammonium sulphate  $PM_{2.5}$  aerosol sample was fitted with a log-normal distribution and a corresponding mass distribution calculated as shown in Figure S3. The ultrafine particles ( $PM_{0.1}$ ) correspond to approximately 3 % of the total mass of the sample, whilst the entire mass distribution was in the fine particle size range ( $PM_{2.5}$ ).

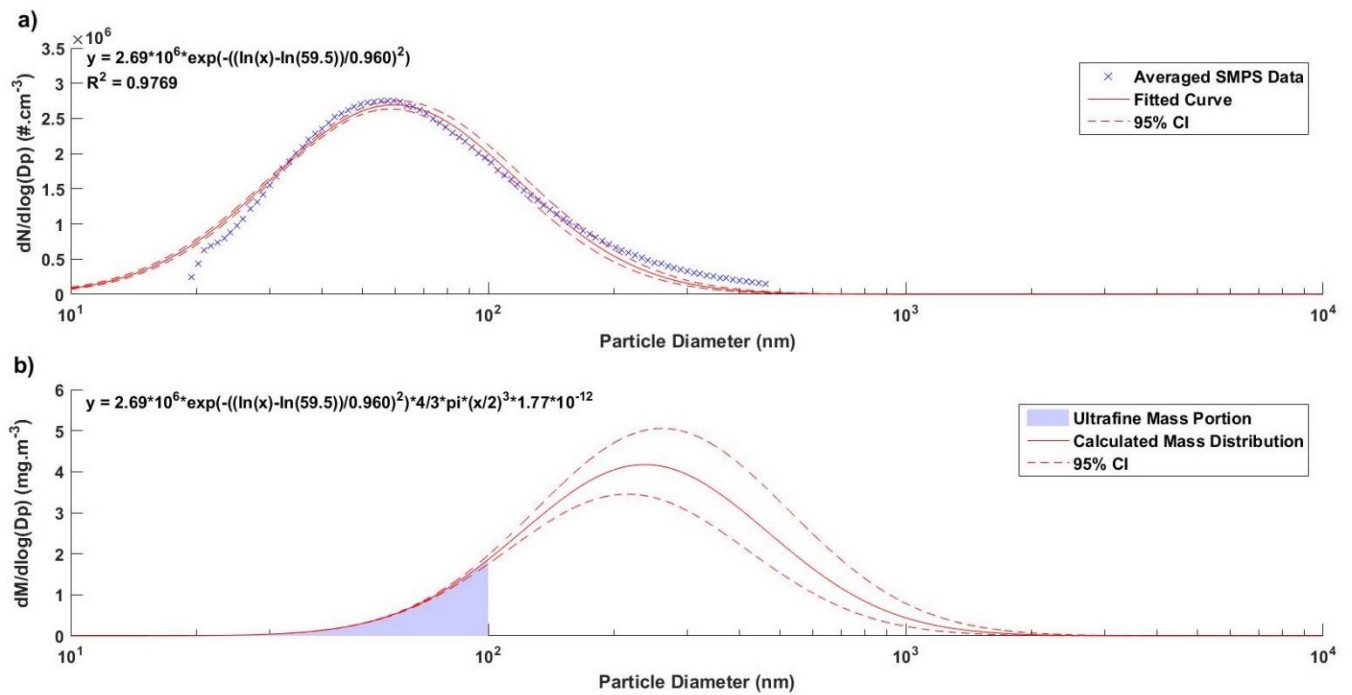

Figure S3 a) is a graph of the averaged SMPS data for the fine particle concentration measurements and a fitted log-normal distribution with 95 % confidence intervals and an  $R^2$  value of 0.9769. b) shows the calculated mass distribution curve with 95 % confidence intervals. The ultrafine mass portion is shaded, corresponding to ~ 3% of the total mass.

The averaged SMPS particle size distribution of the ammonium sulphate  $PM_{0.1}$  aerosol sample was fitted with a log-normal distribution and multiplied by a logistic function to emulate the size cut-off generated by the impactor. This distribution and a corresponding calculated mass distribution is shown in Figure S4. The ultrafine particles ( $PM_{0.1}$ ) correspond to approximately 80 % of the total mass of the sample.

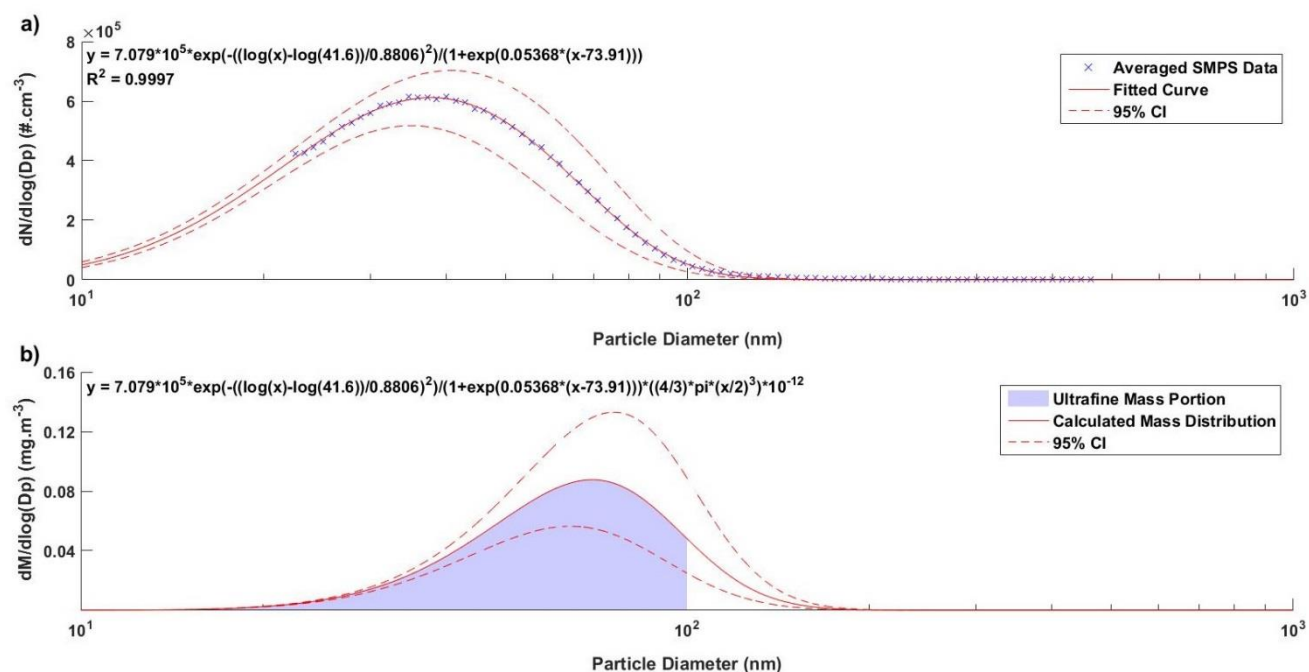

Figure S4 a) The averaged particle number size distribution collected by the SMPS for the ultrafine particle measurements and a fitted log-normal distribution with a logistic function with 95 % confidence intervals and an  $R^2$  value of 0.9997. b) shows the calculated mass distribution curve from the fitted number concentration distribution with 95 % confidence intervals. The ultrafine mass portion is shaded, corresponding to ~80% of the total mass.

The sample data used to calculate the results presented in Sect. 4.1.1. for the fine mass collection efficiency are shown below in Table S1.

| Sample No. | T (min) | $q_{ls}$ (mL.min <sup>-1</sup> ) | $V_{IAC}$ (L) | $V_f$ (L) | $CI_{SO_4^{2-}}$ (ppm) | $CF_{SO_4^{2-}}$ (ppm) | SDF  | CE   |
|------------|---------|----------------------------------|---------------|-----------|------------------------|------------------------|------|------|
| 1          | 15.0    | 0.966                            | 247           | 68.1      | 27.00                  | 124.1                  | 0.88 | 0.99 |
| 2          | 15.0    | 0.966                            | 247           | 69.0      | 26.99                  | 127.8                  | 0.88 | 0.98 |
| 3          | 15.0    | 0.966                            | 247           | 60.0      | 30.18                  | 114.8                  | 0.89 | 1.05 |
| 4          | 15.0    | 0.966                            | 247           | 53.7      | 31.61                  | 113.9                  | 0.88 | 1.00 |
| 5          | 15.0    | 0.966                            | 247           | 59.1      | 33.48                  | 133.8                  | 0.88 | 0.99 |
| 6          | 15.0    | 0.966                            | 247           | 52.3      | 36.36                  | 120.7                  | 0.89 | 1.04 |
| 7          | 15.0    | 0.966                            | 247           | 63.1      | 39.10                  | 159.4                  | 0.89 | 1.02 |
| 8          | 15.0    | 0.966                            | 247           | 63.7      | 39.47                  | 177.6                  | 0.86 | 0.97 |

Table S1 shows the sample time (T), liquid sample flowrate ( $q_{ls}$ ), total IAC sample volume ( $V_{IAC}$ ), total filter sample volume ( $V_f$ ), concentration of sulphate ions in IAC sample ( $CI_{SO_4^{2-}}$ ); concentration of sulphate ions in filter sample ( $CF_{SO_4^{2-}}$ ); Steam Dilution Factor (SDF); and calculated collection efficiency (CE)

The sample data used to calculate the results presented in Sect. 4.1.1. for the ultrafine mass collection efficiency are shown below in Table S2.

| Sample No. | T (min) | $q_{ls}$ (mL.min <sup>-1</sup> ) | $V_{IAC}$ (L) | $V_f$ (L) | $CI_{SO_4^{2-}}$ (ppm) | $CF_{SO_4^{2-}}$ (ppm) | SDF  | CE   |
|------------|---------|----------------------------------|---------------|-----------|------------------------|------------------------|------|------|
| 1          | 60.0    | 0.128                            | 247           | 274.4     | 1.64                   | 8.44                   | 0.53 | 1.01 |
| 2          | 60.0    | 0.128                            | 247           | 281.6     | 1.76                   | 9.31                   | 0.51 | 1.03 |
| 3          | 60.0    | 0.128                            | 247           | 284.5     | 2.21                   | 10.47                  | 0.54 | 1.09 |

Table S2 shows the sample time ( $T$ ), liquid sample flowrate ( $q_{ls}$ ), total IAC sample volume ( $V_{IAC}$ ), total filter sample volume ( $V_f$ ), concentration of sulphate ions in IAC sample ( $CI_{SO_4^{2-}}$ ); concentration of sulphate ions in filter sample ( $CF_{SO_4^{2-}}$ ); Steam Dilution Factor ( $SDF$ ); and calculated collection efficiency ( $CE$ )

### S3. Size Dependent Collection Efficiency

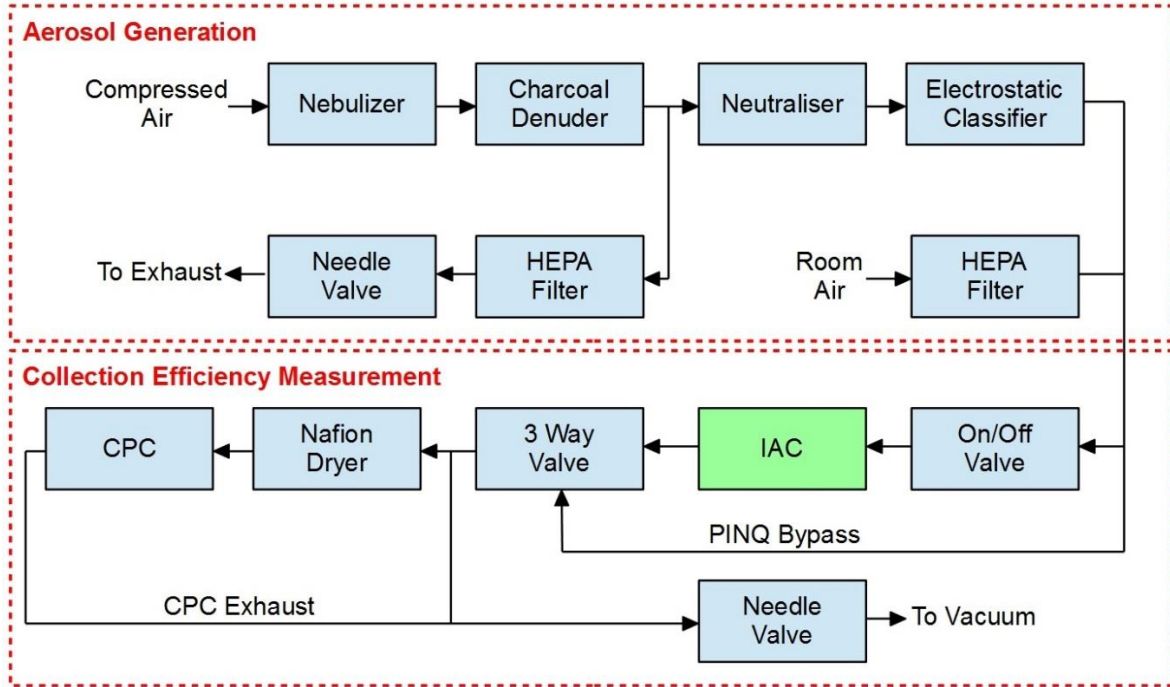

Figure S5 Flow diagram of experimental setup for size dependent collection efficiency experiments. DEHS aerosol is generated through a nebulizer and scrubbed of excess ethanol vapour using a charcoal denuder. Particles are size selected using electrostatic classifier, with classifier aerosol flowrate regulated by the removal of excess aerosol via a filtered needle valve upstream. Monodisperse aerosol sample is mixed with filtered makeup air to generate required sample flowrate. CPC measures PNC before and after the IAC using a bypass flow controlled by a 3-way valve. On/off valve is used to prevent steam backflow into CPC sample when IAC is bypassed. CPC exhaust is connected to the excess flow out of the 3-way valve to prevent pressure differentials in instrument. Sample flowrate is regulated by a needle valve connect to vacuum.

Figure S5 shows a flow diagram of the experimental setup discussed in Sect. 3.1.2 of the manuscript.

The collection efficiency for particles of size  $d_i$  was calculated using Equation S5:

Equation S5

$$CE(d_i) = \frac{(1 - CL)C_{in}(d_i) - C_{out}(d_i)}{C_{in}(d_i)}$$

Where:  $d_i$  is the particle diameter;  $CE(d_i)$  is the number collection efficiency at particle diameter  $d_i$ ;  $C_{in}(d_i)$  is the particle number concentration entering the IAC at particle diameter  $d_i$ ;  $C_{out}(d_i)$  is the particle number concentration exiting the IAC at particle diameter  $d_i$ ; and  $CL$  is the chamber losses defined as:

Equation S6

$$CL = 1 - CE_{ultrafine}$$



Where:  $CE_{\text{ultrafine}}$  is the lower limit of the mass collection efficiency of the ultrafine particle size distribution.

#### S4. PINQ Characterization

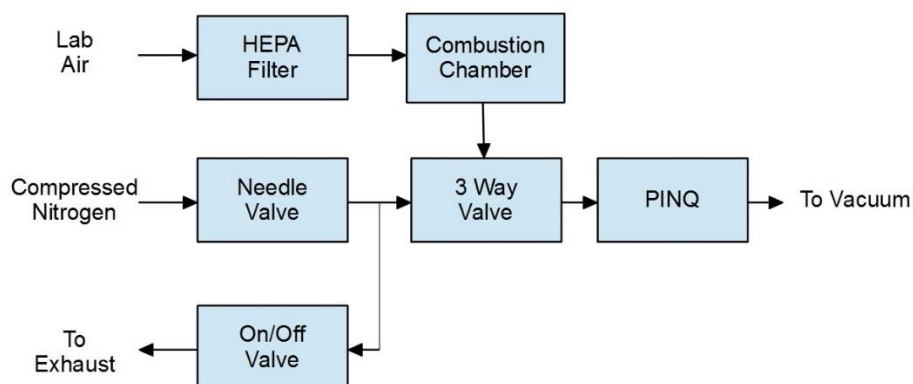

*Figure S6 Flow diagram of the experimental setup for measuring the response time of the instrument. A 3-way valve was periodically used to switch between the combustion chamber source and nitrogen. A HEPA filter was attached to the inlet of the combustion chamber which was left open to lab air to prevent the combustion chamber from dropping below ambient pressure. A needle valve was used to regulate the flow of nitrogen to be slightly in excess of the PINQ sample rate, with the excess being removed via an exhaust line to ensure the PINQ sampled at ambient pressure. An on/off valve was used to shut off the nitrogen exhaust flow whilst the combustion chamber was being sampled.*

Figure S6 shows a flow diagram of the experimental setup described in Sect. 3.2 of the manuscript.
